# Supplementary material for: New CXCR1/CXCR2 inhibitors represent an effective treatment for kidney or head and neck cancers sensitive or refractory to reference treatments
Source: PubMed Central journal article supplement (PMC6691587; doi:10.7150/thno.34681), 2019-07-09
Supplement: thnov09p5332s1.pdf [file thnov09p5332s1.pdf]

| Nº | Structure | IUPAC name                                          | Molecular Weight (g/mol) | HPLC purity (280) | NMR spectrums                                                                                                                                                                                                                                                                                                                                                                                                                                                                                                                              | HRMS                                                                                                                                  |
|----|-----------|-----------------------------------------------------|--------------------------|-------------------|--------------------------------------------------------------------------------------------------------------------------------------------------------------------------------------------------------------------------------------------------------------------------------------------------------------------------------------------------------------------------------------------------------------------------------------------------------------------------------------------------------------------------------------------|---------------------------------------------------------------------------------------------------------------------------------------|
| 1  |           | 1-(2-chlorophenyl)-3-(p-tolyl)urea                  | 260,72                   | 99,7%<br>(280)    | <sup>1</sup> H NMR (200 MHz, DMSO- <i>d</i> <sub>6</sub> ): δ 9.32 (s, 1H, N-H), 8.27 (s, 1H, N-H), 8.17 (d, <i>J</i> = 8.1 Hz, 1H, H <sub>A</sub> ), 7.50 – 7.20 (m, 4H, H <sub>A</sub> ), 7.18 – 6.94 (m, 3H, H <sub>A</sub> ), 2.25 (s, 3H, CH <sub>3</sub> ); <sup>13</sup> C NMR (50 MHz, DMSO- <i>d</i> <sub>6</sub> ): δ 152.14, 136.87, 136.07, 130.97, 129.29 (2C), 129.20, 127.57, 123.15, 121.76, 121.19, 118.27 (2C), 20.37.                                                                                                   | [M+H] <sup>+</sup> calc. for C <sub>14</sub> H <sub>14</sub> ClN <sub>2</sub> O <sup>+</sup> , 261.08, found 261.80                   |
| 2  |           | 1-(2-chlorophenyl)-3-(2,4-dichlorophenyl)urea       | 260,72                   | 93,90%            | <sup>1</sup> H NMR (200 MHz, DMSO- <i>d</i> <sub>6</sub> ): δ 8.84 (s, 1H, N-H), 8.64 (s, 1H, N-H), 7.70 (s, 1H, H <sub>A</sub> ), 7.30 (dd, <i>J</i> = 11.0, 8.0 Hz, 4H, H <sub>A</sub> ), 7.09 (d, <i>J</i> = 8.2 Hz, 2H, H <sub>A</sub> ), 7.00 (dd, <i>J</i> = 7.0, 1.3 Hz, 1H, H <sub>A</sub> ), 2.24 (s, 3H, CH <sub>3</sub> ); <sup>13</sup> C NMR (50 MHz, DMSO- <i>d</i> <sub>6</sub> ): δ 152.41, 141.39, 136.82, 133.19, 130.94, 130.37, 129.20 (2C), 121.30, 118.49 (2C), 117.46, 116.55, 20.35.                               | [M+H] <sup>+</sup> calc. for C <sub>14</sub> H <sub>10</sub> Cl <sub>2</sub> N <sub>2</sub> O <sup>+</sup> , 261.08, found 261.80     |
| 3  |           | 1-(4-chlorophenyl)-3-(p-tolyl)urea                  | 260,72                   | 98,50%            | <sup>1</sup> H NMR (200 MHz, DMSO- <i>d</i> <sub>6</sub> ): δ 8.76 (s, 1H, N-H), 8.59 (s, 1H, N-H), 7.47 (d, <i>J</i> = 8.4 Hz, 2H, H <sub>A</sub> ), 7.32 (d, <i>J</i> = 5.9 Hz, 4H, H <sub>A</sub> ), 7.08 (d, <i>J</i> = 8.0 Hz, 2H, H <sub>A</sub> ), 2.23 (s, 3H, CH <sub>3</sub> ); <sup>13</sup> C NMR (50 MHz, DMSO- <i>d</i> <sub>6</sub> ): δ 152.47, 138.84, 136.94, 130.82, 129.20 (2C), 128.61 (2C), 125.19, 119.63 (2C), 118.41 (2C), 20.36.                                                                                 | [M+H] <sup>+</sup> calc. for C <sub>14</sub> H <sub>14</sub> ClN <sub>2</sub> O <sup>+</sup> , 261.08, found 261.80                   |
| 4  |           | 1-(2-chlorophenyl)-3-(2,4-dichlorophenyl)urea       | 315,58                   | 96,30%            | <sup>1</sup> H NMR (200 MHz, DMSO- <i>d</i> <sub>6</sub> ): δ 9.27 – 8.92 (m, 2H, N-H), 8.09 (t, <i>J</i> = 10.2 Hz, 2H, H <sub>A</sub> ), 7.63 (s, 1H, H <sub>A</sub> ), 7.51 – 7.24 (m, 3H, H <sub>A</sub> ), 7.06 (t, <i>J</i> = 7.3 Hz, 1H, H <sub>A</sub> ); <sup>13</sup> C NMR (50 MHz, DMSO- <i>d</i> <sub>6</sub> ): δ 152.12, 135.58, 135.03, 129.34, 128.66, 127.57, 127.51, 126.62, 124.00, 123.35, 123.16, 122.86, 122.54                                                                                                     | [M+H] <sup>+</sup> calc. for C <sub>14</sub> H <sub>10</sub> Cl <sub>2</sub> N <sub>2</sub> O <sup>+</sup> , 314.98, found 314.87     |
| 5  |           | 1-(3-chlorophenyl)-3-(2,4-dichlorophenyl)urea       | 315,58                   | 98,00%            | <sup>1</sup> H NMR (200 MHz, DMSO- <i>d</i> <sub>6</sub> ): δ 9.63 (s, 1H, N-H), 8.45 (s, 1H, N-H), 8.17 (d, <i>J</i> = 9.0 Hz, 1H, H <sub>A</sub> ), 7.63 (s, 1H, H <sub>A</sub> ), 7.63 (d, <i>J</i> = 1.9 Hz, 1H, H <sub>A</sub> ), 7.44 – 7.19 (m, 3H, H <sub>A</sub> ), 7.05 (d, <i>J</i> = 7.6 Hz, 1H, H <sub>A</sub> ); <sup>13</sup> C NMR (50 MHz, DMSO- <i>d</i> <sub>6</sub> ): δ 151.89, 140.79, 134.94, 133.31, 130.54, 128.60, 127.67, 126.44, 122.91, 122.33, 121.92, 117.62, 116.68.                                       | [M+H] <sup>+</sup> calc. for C <sub>14</sub> H <sub>10</sub> Cl <sub>2</sub> N <sub>2</sub> O <sup>+</sup> , 314.98, found 314.13     |
| 6  |           | 1-(4-chlorophenyl)-3-(2,4-dichlorophenyl)urea       | 315,58                   | 98,40%            | <sup>1</sup> H NMR (200 MHz, DMSO- <i>d</i> <sub>6</sub> ): δ 9.17 – 7.32 (m, 4H, H <sub>A</sub> ), 7.62 (s, 1H, H <sub>A</sub> ), 8.18 (d, <i>J</i> = 8.0 Hz, 2H, H <sub>A</sub> ), 8.42 (s, 1H, N-H), 9.57 (s, 1H, N-H); <sup>13</sup> C NMR (50 MHz, DMSO- <i>d</i> <sub>6</sub> ): δ 151.91, 138.26, 135.06, 128.77 (2C), 128.58, 127.66, 126.28, 125.80, 122.78, 122.20, 119.76 (2C).                                                                                                                                                 | [M+H] <sup>+</sup> calc. for C <sub>14</sub> H <sub>10</sub> Cl <sub>2</sub> N <sub>2</sub> O <sup>+</sup> , 314.98, found 314.87     |
| 7  |           | 1-phenyl-3-(p-tolyl)thiourea                        | 242,34                   | 95,70%            | <sup>1</sup> H NMR (200 MHz, DMSO- <i>d</i> <sub>6</sub> ): δ 9.72 (s, 2H, 2N-H), 7.45 (d, <i>J</i> = 7.6 Hz, 2H, H <sub>A</sub> ), 7.29 (t, <i>J</i> = 7.8 Hz, 4H, H <sub>A</sub> ), 7.16 – 7.02 (m, 3H, H <sub>A</sub> ), 2.24 (s, 3H, CH <sub>3</sub> ); <sup>13</sup> C NMR (50 MHz, DMSO- <i>d</i> <sub>6</sub> ): δ 179.57, 139.54, 136.81, 133.67, 128.91 (2C), 128.40 (2C), 124.31, 123.83 (2C), 123.58 (2C), 20.55.                                                                                                               | [M+H] <sup>+</sup> calc. for C <sub>14</sub> H <sub>13</sub> N <sub>2</sub> S <sup>+</sup> , 243.09, found 243.13                     |
| 8  |           | 1-(2,4-dichlorophenyl)-3-phenylthiourea             | 297,2                    | 98,60%            | <sup>1</sup> H NMR (200 MHz, DMSO- <i>d</i> <sub>6</sub> ): δ 10.08 (s, 1H, N-H), 9.48 (s, 1H, N-H), 7.68 (d, <i>J</i> = 2.2 Hz, 1H, H <sub>A</sub> ), 7.62 (d, <i>J</i> = 8.6 Hz, 1H, H <sub>A</sub> ), 7.42 (ddd, <i>J</i> = 15.8, 15.3, 7.5 Hz, 5H, H <sub>A</sub> ), 7.16 (t, <i>J</i> = 7.1 Hz, 1H, H <sub>A</sub> ); <sup>13</sup> C NMR (50 MHz, DMSO- <i>d</i> <sub>6</sub> ): δ 180.37, 139.06, 135.77, 131.27, 131.04, 130.93, 128.94, 128.66 (2C), 127.39, 124.95, 123.93 (2C).                                                 | [M+H] <sup>+</sup> calc. for C <sub>13</sub> H <sub>11</sub> Cl <sub>2</sub> N <sub>2</sub> S <sup>+</sup> , 297.00, found 297.13     |
| 9  |           | 1,3-bis(3-chlorophenyl)urea                         | 281,14                   | 98,80%            | <sup>1</sup> H NMR (400 MHz, DMSO- <i>d</i> <sub>6</sub> ): δ 8.96 (s, 2H, N-H), 7.70 (t, <i>J</i> = 1.7 Hz, 2H, H <sub>A</sub> ), 7.34 – 7.24 (m, 4H, H <sub>A</sub> ), 7.03 (dt, <i>J</i> = 7.3, 1.8 Hz, 2H, H <sub>A</sub> ); <sup>13</sup> C NMR (101 MHz, DMSO- <i>d</i> <sub>6</sub> ): δ 152.25, 140.99 (2C), 133.20 (2C), 130.41 (2C), 121.71 (2C), 117.76 (2C), 116.84 (2C).                                                                                                                                                      | [M+H] <sup>+</sup> calc. for C <sub>13</sub> H <sub>11</sub> Cl <sub>2</sub> N <sub>2</sub> S <sup>+</sup> , 281.02, found 281.13     |
| 10 |           | 1,3-bis(4-chlorophenyl)urea                         | 281,14                   | 96,90%            | <sup>1</sup> H NMR (200 MHz, DMSO- <i>d</i> <sub>6</sub> ): δ 8.86 (s, 2H, N-H), 7.56 – 7.42 (m, 4H, H <sub>A</sub> ), 7.39 – 7.26 (m, 4H, H <sub>A</sub> ); <sup>13</sup> C NMR (50 MHz, DMSO- <i>d</i> <sub>6</sub> ): δ 152.34, 138.55 (2C), 128.63 (4C), 125.49 (2C), 119.82 (4C).                                                                                                                                                                                                                                                     | [M+H] <sup>+</sup> calc. for C <sub>13</sub> H <sub>11</sub> Cl <sub>2</sub> N <sub>2</sub> S <sup>+</sup> , 281.02, found 281.11     |
| 11 |           | 1-(3-chlorophenyl)-3-(2-hydroxyphenyl)urea          | 262,69                   |                   | <sup>1</sup> H NMR (400 MHz, DMSO- <i>d</i> <sub>6</sub> ): δ 9.97 (s, 1H), 9.50 (s, 1H), 8.20 (s, 1H), 8.03 (d, <i>J</i> = 7.7 Hz, 1H, H <sub>A</sub> ), 7.73 (s, 1H), 7.29 (t, <i>J</i> = 8.0 Hz, 1H, H <sub>A</sub> ), 7.21 (d, <i>J</i> = 8.5 Hz, 1H, H <sub>A</sub> ), 7.00 (d, <i>J</i> = 7.8 Hz, 1H, H <sub>A</sub> ), 6.88 – 6.71 (m, 3H, H <sub>A</sub> ); <sup>13</sup> C NMR (101 MHz, DMSO- <i>d</i> <sub>6</sub> ): δ 152.35, 145.72, 141.54, 133.31, 130.42, 127.55, 122.04, 121.25, 119.19, 118.70, 117.22, 116.27, 114.45. | [M+H] <sup>+</sup> calc. for C <sub>13</sub> H <sub>11</sub> ClN <sub>2</sub> O <sup>+</sup> , 281.02, found 281.11                   |
| 12 |           | 1-(4-chlorophenyl)-3-(2-hydroxyphenyl)urea          | 262,69                   | 98,00%            | <sup>1</sup> H NMR (200 MHz, DMSO- <i>d</i> <sub>6</sub> ): δ 9.98 (s, 1H), 9.45 (s, 1H), 8.19 (s, 1H), 8.09 – 7.96 (m, 1H, H <sub>A</sub> ), 7.48 (d, <i>J</i> = 8.8 Hz, 2H, H <sub>A</sub> ), 7.31 (d, <i>J</i> = 8.8 Hz, 2H, H <sub>A</sub> ), 6.91 – 6.67 (m, 3H, H <sub>A</sub> ); <sup>13</sup> C NMR (50 MHz, DMSO- <i>d</i> <sub>6</sub> ): δ 152.52, 145.77, 139.07, 128.73 (2C), 127.77, 125.24, 121.99, 119.43 (2C), 119.26, 118.76, 114.53.                                                                                    | [M+H] <sup>+</sup> calc. for C <sub>13</sub> H <sub>11</sub> ClN <sub>2</sub> O <sup>+</sup> , 263.05818; Found: 263.05823            |
| 13 |           | 1-(1H-benzod[imidazol-2-yl]-3-phenyl)urea           | 252,28                   | 96,40%            | <sup>1</sup> H NMR (200 MHz, DMSO- <i>d</i> <sub>6</sub> ): δ 11.16 (br. s, 2H, 2N-H), 9.57 (s, 1H, N-H), 7.57 (d, <i>J</i> = 7.1 Hz, 2H, H <sub>A</sub> ), 7.48 – 7.21 (m, 4H, H <sub>A</sub> ), 7.17 – 6.90 (m, 3H, H <sub>A</sub> ); <sup>13</sup> C NMR (50 MHz, DMSO- <i>d</i> <sub>6</sub> ): δ 154.04, 148.95, 139.36, 135.03 (2C), 128.83 (2C), 122.32, 120.95 (2C), 118.55 (2C), 112.88 (2C).                                                                                                                                     | [M+H] <sup>+</sup> calc. for C <sub>14</sub> H <sub>13</sub> N <sub>4</sub> O <sup>+</sup> , 253.11, found 253.13                     |
| 14 |           | 1-(1H-benzod[imidazol-2-yl]-3-(2-chlorophenyl)urea  | 286,72                   | 98,20%            | <sup>1</sup> H NMR (200 MHz, DMSO- <i>d</i> <sub>6</sub> ): δ (ppm): 7.03-7.15 (m, 3H, H <sub>A</sub> ), 7.29-7.43 (m, 3H, H <sub>A</sub> ), 7.51 (dd, <i>J</i> = 8 Hz, <i>J</i> = 2 Hz, 1H, H <sub>A</sub> ), 8.27 (d, <i>J</i> = 8 Hz, 1H, H <sub>A</sub> ), 10.21 (s, 1H, N-H), 11.28 (s, 2H, N-H).                                                                                                                                                                                                                                     | [M+H] <sup>+</sup> calc. for C <sub>14</sub> H <sub>12</sub> ClN <sub>4</sub> O <sup>+</sup> , 287.07, found 287.06                   |
| 15 |           | 1-(1H-benzod[imidazol-2-yl]-3-(3-chlorophenyl)urea  | 286,72                   | 98,00%            | <sup>1</sup> H NMR (200 MHz, DMSO- <i>d</i> <sub>6</sub> ): δ 11.44 (br. s, 2H, 2N-H), 9.61 (s, 1H, N-H), 7.90 (t, <i>J</i> = 1.9 Hz, 1H, H <sub>A</sub> ), 7.47 – 7.24 (m, 4H, H <sub>A</sub> ), 7.14 – 6.95 (m, 3H, H <sub>A</sub> ); <sup>13</sup> C NMR (50 MHz, DMSO- <i>d</i> <sub>6</sub> ): δ 112.2 (2C), 116.8 (2C), 117.7 (2C), 121.3, 121.5 130.3 (2C), 133.1 (2C), 141.3 150.1.                                                                                                                                                | ESI (m/z): [M+H] <sup>+</sup> for C <sub>14</sub> H <sub>12</sub> ClN <sub>4</sub> O <sup>+</sup> , 287.07, found 287.13              |
| 16 |           | 1-(1H-benzod[imidazol-2-yl]-3-(4-chlorophenyl)urea  | 286,72                   | 96,00%            | <sup>1</sup> H NMR (200 MHz, DMSO- <i>d</i> <sub>6</sub> ): δ 11.33 (s, 2H, 2N-H), 9.61 (s, 1H, N-H), 7.63 (d, <i>J</i> = 8.6 Hz, 2H, H <sub>A</sub> ), 7.34 (d, <i>J</i> = 6.1 Hz, 4H, H <sub>A</sub> ), 7.07 (dd, <i>J</i> = 4.6, 3.4 Hz, 2H, H <sub>A</sub> ); <sup>13</sup> C NMR (50 MHz, DMSO- <i>d</i> <sub>6</sub> ): δ 149.68, 138.79, 138.62, 133.86, 128.58 (2C), 125.51, 121.12 (2C), 119.95 (2C), 119.75, 112.45 (2C).                                                                                                        | ESI (m/z): [M+H] <sup>+</sup> calc. for C <sub>14</sub> H <sub>12</sub> ClN <sub>4</sub> O <sup>+</sup> , 287.07, found 287.13        |
| 17 |           | 1-(1H-benzod[imidazol-2-yl]-3-(4-methoxyphenyl)urea | 282,3                    | 97,90%            | <sup>1</sup> H NMR (200 MHz, DMSO- <i>d</i> <sub>6</sub> ): δ 10.99 (br. s, 2H, 2N-H), 9.46 (s, 1H, N-H), 7.47 (d, <i>J</i> = 8.7 Hz, 2H, H <sub>A</sub> ), 7.37 (dd, <i>J</i> = 5.5, 2.9 Hz, 2H, H <sub>A</sub> ), 7.05 (dd, <i>J</i> = 5.3, 2.9 Hz, 2H, H <sub>A</sub> ), 6.90 (d, <i>J</i> = 8.7 Hz, 2H, H <sub>A</sub> ), 3.73 (s, 3H, OCH <sub>3</sub> ); <sup>13</sup> C NMR (50 MHz, DMSO- <i>d</i> <sub>6</sub> ): δ 154.97, 153.62, 148.86, 135.58 (2C), 132.24, 120.95 (2C), 120.52 (2C), 114.10 (2C), 113.12 (2C), 55.21.       | [M+H] <sup>+</sup> calc. for C <sub>13</sub> H <sub>13</sub> N <sub>4</sub> O <sub>2</sub> <sup>+</sup> , 283.11895; Found: 283.11902 |
| 18 |           | 1-(benzo[d]oxazol-2-yl)-3-phenylurea                | 253,26                   | 98,30%            | <sup>1</sup> H NMR (200 MHz, DMSO- <i>d</i> <sub>6</sub> ): δ (ppm): 6.96 (t, <i>J</i> = 7 Hz, 1H, H <sub>A</sub> ), 7.27 (t, <i>J</i> = 7 Hz, 2H, H <sub>A</sub> ), 7.35-7.55 (m, 6H, H <sub>A</sub> ), 8.73 (s, 1H, N-H); <sup>13</sup> C NMR (50 MHz, DMSO- <i>d</i> <sub>6</sub> ): δ (ppm): 118.5 (2C), 122.0, 129.0 (2C), 129.1, 129.1 (2C), 129.2 (2C), 135.0, 140.0, 149.2, 152.9.                                                                                                                                                 | [M+H-NHCO] <sup>+</sup> calc. for C <sub>13</sub> H <sub>11</sub> N <sub>2</sub> O <sup>+</sup> , 211.09, found 211.27                |

|    |                                                                                    |                                                          |        |         |                                                                                                                                                                                                                                                                                                                                                                                                                                                                                                                                                                                                                                             |                                                                                                                                          |
|----|------------------------------------------------------------------------------------|----------------------------------------------------------|--------|---------|---------------------------------------------------------------------------------------------------------------------------------------------------------------------------------------------------------------------------------------------------------------------------------------------------------------------------------------------------------------------------------------------------------------------------------------------------------------------------------------------------------------------------------------------------------------------------------------------------------------------------------------------|------------------------------------------------------------------------------------------------------------------------------------------|
| 19 | 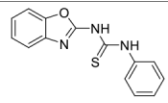   | 1-(benzo[d]oxazol-2-yl)-3-phenylthiourea                 | 269,32 | 98,40%  | <sup>1</sup> H NMR (200 MHz, DMSO-d <sub>6</sub> ): δ (ppm) : 7.03 (t, J = 8 Hz, 1H, H <sub>A</sub> ), 7.16 (td, J = 8 Hz, J = 2 Hz, 1H, H <sub>A</sub> ), 7.22 (td, J = 8 Hz, J = 2 Hz, 1H, H <sub>A</sub> ), 7.37 (t, J = 8 Hz, 2H, H <sub>A</sub> ), 7.47 (t, J = 8 Hz, 2H, H <sub>A</sub> ), 7.76 (d, J = 8 Hz, 2H, H <sub>A</sub> ), 10.62 (s, 1H, N-H). <sup>13</sup> C NMR (50 MHz, DMSO-d <sub>6</sub> ): δ 109.0, 116.6, 117.5 (2C), 121.7, 122.1, 124.0, 129.0 (2C), 133.1, 138.7, 142.4, 147.0, 158.0.                                                                                                                           | [M+H] <sup>+</sup> calc. for C <sub>13</sub> H <sub>11</sub> N <sub>2</sub> O <sup>+</sup> , 211.09, found 211.27                        |
| 20 |    | 1-(benzo[d]thiazol-2-yl)-3-phenylurea                    | 269,32 | 95,40%  | <sup>1</sup> H NMR (200 MHz, DMSO-d <sub>6</sub> ): δ 10.88 (br. s, 1H, N-H), 9.19 (s, 1H, N-H), 7.91 (d, J = 7.1 Hz, 1H, H <sub>A</sub> ), 7.65 (d, J = 7.8 Hz, 1H, H <sub>A</sub> ), 7.55 (d, J = 1.2 Hz, 2H, H <sub>A</sub> ), 7.45 – 7.29 (m, 3H, H <sub>A</sub> ), 7.29 – 7.20 (m, 1H, H <sub>A</sub> ), 7.06 (t, J = 7.3 Hz, 1H, H <sub>A</sub> ). <sup>13</sup> C NMR (50 MHz, DMSO-d <sub>6</sub> ): δ 159.81, 152.29, 147.93, 138.56, 131.17, 128.97 (2C), 125.99, 122.99, 122.94, 121.54, 119.30, 118.89 (2C).                                                                                                                    | [M+H] <sup>+</sup> calc. for C <sub>14</sub> H <sub>12</sub> N <sub>2</sub> O <sup>+</sup> , 270.06956; Found: 270.06961                 |
| 21 |    | 1-(benzo[d]thiazol-2-yl)-3-(2-chlorophenyl)urea          | 303,76 | 95,20%  | <sup>1</sup> H NMR (200 MHz, DMSO-d <sub>6</sub> ): δ 11.46 (br. s, 1H, N-H), 9.14 (br. s, 1H, N-H), 8.18 (d, J = 8.1 Hz, 1H, H <sub>A</sub> ), 7.94 (d, J = 7.2 Hz, 1H, H <sub>A</sub> ), 7.69 (d, J = 8.1 Hz, 1H, H <sub>A</sub> ), 7.52 (d, J = 7.4 Hz, 1H, H <sub>A</sub> ), 7.46 – 7.21 (m, 3H, H <sub>A</sub> ), 7.12 (t, J = 7.2 Hz, 1H, H <sub>A</sub> ). <sup>13</sup> C NMR (50 MHz, DMSO-d <sub>6</sub> ): δ 159.31, 151.50, 148.93, 134.93, 131.33, 129.39, 127.76, 126.03, 124.48, 123.10, 122.74, 121.71, 121.55, 119.95.                                                                                                     | [M+H] <sup>+</sup> calc. for C <sub>14</sub> H <sub>11</sub> ClN <sub>2</sub> O <sup>+</sup> , 304.03059; Found: 304.03064               |
| 22 |    | 1-(benzo[d]thiazol-2-yl)-3-(3-chlorophenyl)urea          | 303,76 | 99,40%  | <sup>1</sup> H NMR (200 MHz, DMSO-d <sub>6</sub> ): δ 11.17 (br. s, 1H, N-H), 9.41 (s, 1H, N-H), 7.90 (d, J = 7.3 Hz, 1H, H <sub>A</sub> ), 7.76 (d, J = 1.9 Hz, 1H, H <sub>A</sub> ), 7.63 (d, J = 7.8 Hz, 1H, H <sub>A</sub> ), 7.46 – 7.30 (m, 3H, H <sub>A</sub> ), 7.25 (td, J = 7.7, 1.2 Hz, 1H, H <sub>A</sub> ), 7.10 (dt, J = 7.1, 1.9 Hz, 1H, H <sub>A</sub> ). <sup>13</sup> C NMR (50 MHz, DMSO-d <sub>6</sub> ): δ 160.32, 153.03, 146.80, 140.27, 133.36, 130.70, 130.44, 126.05, 122.95, 122.50, 121.62, 118.71, 118.25, 117.28.                                                                                             | [M+H] <sup>+</sup> calc. for C <sub>14</sub> H <sub>11</sub> ClN <sub>2</sub> O <sup>+</sup> , 304.03059; Found: 304.0306                |
| 23 |    | 1-(benzo[d]thiazol-2-yl)-3-(4-chlorophenyl)urea          | 303,76 | 100,00% | <sup>1</sup> H NMR (400 MHz, DMSO-d <sub>6</sub> ): δ 10.97 (br. s, 1H, N-H), 9.33 (s, 1H, N-H), 7.90 (d, J = 7.8 Hz, 1H, H <sub>A</sub> ), 7.64 (d, J = 7.7 Hz, 1H, H <sub>A</sub> ), 7.57 (d, J = 8.7 Hz, 2H, H <sub>A</sub> ), 7.43 – 7.34 (m, 3H, H <sub>A</sub> ), 7.28 – 7.21 (m, 1H, H <sub>A</sub> ). <sup>13</sup> C NMR (50 MHz, DMSO-d <sub>6</sub> ): δ 160.11, 152.74, 147.16, 137.66, 130.83, 128.77, 126.54, 126.04, 122.95, 121.60, 120.39, 118.95.                                                                                                                                                                         | [M+H] <sup>+</sup> calc. for C <sub>14</sub> H <sub>11</sub> ClN <sub>2</sub> O <sup>+</sup> , 304.03059; Found: 304.03076               |
| 24 |    | 1-(benzo[d]thiazol-2-yl)-3-(4-methoxyphenyl)urea         | 299,35 | 97,30%  | <sup>1</sup> H NMR (200 MHz, DMSO-d <sub>6</sub> ): δ 10.81 (s, 1H, N-H), 9.00 (s, 1H, N-H), 7.90 (d, J = 7.8 Hz, 1H, H <sub>A</sub> ), 7.65 (d, J = 7.9 Hz, 1H, H <sub>A</sub> ), 7.50 – 7.33 (m, 3H, H <sub>A</sub> ), 7.23 (t, J = 7.5 Hz, 1H, H <sub>A</sub> ), 6.92 (d, J = 8.9 Hz, 2H, H <sub>A</sub> ), 3.73 (s, 3H, OCH <sub>3</sub> ). <sup>13</sup> C NMR (50 MHz, DMSO-d <sub>6</sub> ): δ 159.85, 155.32, 152.26, 148.23, 131.45, 131.28, 125.95, 122.83, 121.49, 120.83 (2C), 119.37, 114.13 (2C), 55.19.                                                                                                                      | [M+H] <sup>+</sup> calc. for C <sub>15</sub> H <sub>14</sub> N <sub>2</sub> O <sub>2</sub> S <sup>+</sup> , 300.08012; Found: 300.08023  |
| 25 |  | 1-(2-chlorophenyl)-3-(6-methylbenzo[d]thiazol-2-yl)urea  | 317,79 | 99,20%  | <sup>1</sup> H NMR (200 MHz, DMSO-d <sub>6</sub> ): δ 11.39 (s, 1H, N-H), 9.14 (s, 1H, N-H), 8.18 (dd, J = 8.3, 1.4 Hz, 1H, H <sub>A</sub> ), 7.73 (s, 1H, H <sub>A</sub> ), 7.63 – 7.45 (m, 2H, H <sub>A</sub> ), 7.42 – 7.30 (m, 1H, H <sub>A</sub> ), 7.22 (dd, J = 8.3, 1.2 Hz, 1H, H <sub>A</sub> ), 7.12 (dt, J = 7.6, 1.5 Hz, 1H, H <sub>A</sub> ), 2.40 (s, 3H, CH <sub>3</sub> ). <sup>13</sup> C NMR (50 MHz, DMSO-d <sub>6</sub> ): δ 158.38, 151.37, 146.74, 134.91, 132.41, 131.37, 129.27, 127.64, 127.18, 124.24, 122.52, 121.48, 121.12, 119.52, 20.83.                                                                     | [M+H] <sup>+</sup> calc. for C <sub>15</sub> H <sub>13</sub> ClN <sub>2</sub> O <sup>+</sup> , 318.04624; Found: 318.04630               |
| 26 |  | 1-(3-chlorophenyl)-3-(6-methylbenzo[d]thiazol-2-yl)urea  | 317,79 | 95,50%  | <sup>1</sup> H NMR (400 MHz, DMSO-d <sub>6</sub> ): δ 11.06 (br. s, 1H, N-H), 9.37 (s, 1H, N-H), 7.76 (s, 1H, H <sub>A</sub> ), 7.68 (s, 1H, H <sub>A</sub> ), 7.51 (d, J = 7.4 Hz, 1H, H <sub>A</sub> ), 7.42 – 7.30 (m, 2H, H <sub>A</sub> ), 7.20 (d, J = 7.7 Hz, 1H, H <sub>A</sub> ), 7.09 (d, J = 6.9 Hz, 1H, H <sub>A</sub> ), 2.38 (s, 3H, CH <sub>3</sub> ). <sup>13</sup> C NMR (50 MHz, DMSO-d <sub>6</sub> ): δ 159.52, 152.91, 144.86, 140.33, 133.42, 132.36, 130.89, 130.39, 127.25, 122.44, 121.29, 118.41, 118.23, 117.23, 20.90.                                                                                          | [M+H] <sup>+</sup> calc. for C <sub>15</sub> H <sub>13</sub> ClN <sub>2</sub> O <sup>+</sup> , 318.04624; Found: 318.04626               |
| 27 |  | 1-(6-methylbenzo[d]thiazol-2-yl)-3-(m-tolyl)urea         | 297,38 | 99,60%  | <sup>1</sup> H NMR (200 MHz, DMSO-d <sub>6</sub> ): δ 10.75 (br. s, 1H, N-H), 9.08 (s, 1H, N-H), 7.70 (s, 1H, H <sub>A</sub> ), 7.53 (d, J = 8.1 Hz, 1H, H <sub>A</sub> ), 7.35 (s, 1H, H <sub>A</sub> ), 7.33 – 7.15 (m, 3H, H <sub>A</sub> ), 6.87 (d, J = 7.2 Hz, 1H, H <sub>A</sub> ), 2.39 (s, 3H, CH <sub>3</sub> ), 2.30 (s, 3H, CH <sub>3</sub> ). <sup>13</sup> C NMR (50 MHz, DMSO-d <sub>6</sub> ): δ 158.91, 152.09, 146.09, 138.51, 138.24, 132.26, 131.34, 128.77, 127.17, 123.68, 121.19, 119.30, 119.04, 115.97, 21.18, 20.89.                                                                                              | [M+H] <sup>+</sup> calc. for C <sub>16</sub> H <sub>16</sub> N <sub>2</sub> O <sub>2</sub> S <sup>+</sup> , 298.10086; Found: 298.10092  |
| 28 |  | 1-(2-chlorophenyl)-3-(6-nitrobenzo[d]thiazol-2-yl)urea   | 348,76 | 97,70%  | <sup>1</sup> H NMR (400 MHz, DMSO-d <sub>6</sub> ): δ 11.79 (s, 1H, N-H), 8.93 (s, 1H, N-H), 8.90 (d, J = 2.4 Hz, 1H, H <sub>A</sub> ), 8.17 (dd, J = 8.9, 2.4 Hz, 1H, H <sub>A</sub> ), 8.12 (dd, J = 8.3, 1.2 Hz, 1H, H <sub>A</sub> ), 7.74 (d, J = 8.9 Hz, 1H, H <sub>A</sub> ), 7.47 (dd, J = 8.0, 1.3 Hz, 1H, H <sub>A</sub> ), 7.36 – 7.30 (m, 1H, H <sub>A</sub> ), 7.10 (td, J = 7.9, 1.4 Hz, 1H, H <sub>A</sub> ). <sup>13</sup> C NMR (101 MHz, DMSO-d <sub>6</sub> ): δ 164.50, 153.86, 151.28, 142.48, 134.53, 132.19, 129.37, 127.74, 124.73, 122.84, 121.66, 121.63, 119.80, 118.58.                                         | [M+H] <sup>+</sup> calc. for C <sub>14</sub> H <sub>9</sub> ClN <sub>2</sub> O <sub>3</sub> S <sup>+</sup> , 349.01567; Found: 349.01569 |
| 29 |  | 1-(3-chlorophenyl)-3-(6-nitrobenzo[d]thiazol-2-yl)urea   | 348,76 | 100,00% | <sup>1</sup> H NMR (400 MHz, DMSO-d <sub>6</sub> ): δ 11.44 (s, 1H, N-H), 9.41 (s, 1H, N-H), 8.95 (d, J = 1.9 Hz, 1H, H <sub>A</sub> ), 8.23 (dd, J = 8.9, 2.4 Hz, 1H, H <sub>A</sub> ), 7.76 (d, J = 8.8 Hz, 1H, H <sub>A</sub> ), 7.72 (s, 1H, H <sub>A</sub> ), 7.41 – 7.32 (m, 2H, H <sub>A</sub> ), 7.12 (dd, J = 8.9, 1.7 Hz, 1H, H <sub>A</sub> ). <sup>13</sup> C NMR (101 MHz, DMSO-d <sub>6</sub> ): δ 164.86, 153.40, 152.37, 142.54, 139.76, 133.29, 131.87, 130.57, 122.93, 121.85, 119.20, 118.73, 118.42, 117.53.                                                                                                            | [M+H] <sup>+</sup> calc. for C <sub>14</sub> H <sub>9</sub> ClN <sub>2</sub> O <sub>3</sub> S <sup>+</sup> , 349.01567; Found: 349.01569 |
| 30 |  | 1-(6-ethoxybenzo[d]thiazol-2-yl)-3-(o-tolyl)urea         | 327,40 | 97,00%  | <sup>1</sup> H NMR (200 MHz, DMSO-d <sub>6</sub> ): δ 10.97 (br. s, 1H, N-H), 8.64 (s, 1H, N-H), 7.86 (d, J = 7.7 Hz, 1H, H <sub>A</sub> ), 7.63 – 7.42 (m, 2H, H <sub>A</sub> ), 7.20 (t, J = 8.5 Hz, 2H, H <sub>A</sub> ), 7.09 – 6.89 (m, 2H, H <sub>A</sub> ), 4.05 (dd, J = 13.7, 6.6 Hz, 2H, CH <sub>2</sub> ), 2.28 (s, 3H, CH <sub>3</sub> ), 1.34 (t, J = 6.8 Hz, 3H, CH <sub>3</sub> ). <sup>13</sup> C NMR (50 MHz, DMSO-d <sub>6</sub> ): δ 157.52, 154.98, 151.65, 143.04, 136.36, 132.58, 130.37, 127.97, 126.36, 123.64, 121.13, 120.41, 114.76, 105.54, 63.58, 17.81, 14.74.                                                | [M+H] <sup>+</sup> calc. for C <sub>17</sub> H <sub>18</sub> N <sub>2</sub> O <sub>2</sub> S <sup>+</sup> , 328.11142; Found: 328.11154  |
| 31 |  | 1-(6-ethoxybenzo[d]thiazol-2-yl)-3-(m-tolyl)urea         | 327,40 | 97,50%  | <sup>1</sup> H NMR (200 MHz, DMSO-d <sub>6</sub> ): δ 10.65 (br. s, 1H, N-H), 9.05 (s, 1H, N-H), 7.54 (d, J = 8.8 Hz, 1H, H <sub>A</sub> ), 7.50 (d, J = 2.5 Hz, 1H, H <sub>A</sub> ), 7.38 – 7.15 (m, 3H, H <sub>A</sub> ), 6.96 (dd, J = 8.8, 2.6 Hz, 1H, H <sub>A</sub> ), 6.87 (d, J = 6.9 Hz, 1H, H <sub>A</sub> ), 4.05 (q, J = 6.9 Hz, 2H, CH <sub>2</sub> ), 2.30 (s, 3H, CH <sub>3</sub> ), 1.34 (t, J = 7.0 Hz, 3H, CH <sub>3</sub> ). <sup>13</sup> C NMR (50 MHz, DMSO-d <sub>6</sub> ): δ 157.57, 154.95, 151.86, 142.31, 138.46, 138.24, 132.49, 128.78, 123.65, 120.04, 119.25, 115.91, 114.79, 105.52, 63.59, 21.17, 14.73. | [M+H] <sup>+</sup> calc. for C <sub>17</sub> H <sub>18</sub> N <sub>2</sub> O <sub>2</sub> S <sup>+</sup> , 328.11142; Found: 328.11151  |
| 32 |  | 1-(6-ethoxybenzo[d]thiazol-2-yl)-3-(p-tolyl)urea         | 327,40 | 100,00% | <sup>1</sup> H NMR (200 MHz, DMSO-d <sub>6</sub> ): δ 10.63 (s, 1H, N-H), 9.03 (s, 1H, N-H), 7.54 (d, J = 8.8 Hz, 1H, H <sub>A</sub> ), 7.49 (d, J = 2.5 Hz, 1H, H <sub>A</sub> ), 7.39 (d, J = 8.4 Hz, 2H, H <sub>A</sub> ), 7.13 (d, J = 8.3 Hz, 2H, H <sub>A</sub> ), 6.96 (dd, J = 8.8, 2.6 Hz, 1H, H <sub>A</sub> ), 4.05 (q, J = 6.9 Hz, 2H, CH <sub>2</sub> ), 2.26 (s, 3H, CH <sub>3</sub> ), 1.34 (t, J = 7.0 Hz, 3H, CH <sub>3</sub> ). <sup>13</sup> C NMR (50 MHz, DMSO-d <sub>6</sub> ): δ 157.56, 154.94, 151.90, 142.41, 135.98, 132.52, 131.86, 129.34 (2C), 120.07, 118.84 (2C), 114.73, 105.53, 63.57, 20.39, 14.73.      | [M+H] <sup>+</sup> calc. for C <sub>17</sub> H <sub>18</sub> N <sub>2</sub> O <sub>2</sub> S <sup>+</sup> , 328.11142; Found: 328.11157  |
| 33 |  | 1-(6-ethoxybenzo[d]thiazol-2-yl)-3-(4-methoxyphenyl)urea | 343,4  | 98,20%  | <sup>1</sup> H NMR (200 MHz, DMSO-d <sub>6</sub> ): δ 10.61 (br. s, 1H, N-H), 8.95 (s, 1H, N-H), 7.53 (d, J = 8.8 Hz, 1H, H <sub>A</sub> ), 7.49 (d, J = 2.5 Hz, 1H, H <sub>A</sub> ), 7.46 – 7.33 (m, 2H, H <sub>A</sub> ), 7.01 – 6.85 (m, 3H, H <sub>A</sub> ), 4.04 (q, J = 6.9 Hz, 2H, CH <sub>2</sub> ), 3.73 (s, 3H, OCH <sub>3</sub> ), 1.34 (t, J = 6.9 Hz, 3H, CH <sub>3</sub> ). <sup>13</sup> C NMR (50 MHz, DMSO-d <sub>6</sub> ): δ 157.71, 155.25, 154.96, 152.03, 142.51, 132.58, 131.49, 120.72 (2C), 120.12, 114.67, 114.10 (2C), 105.53, 63.60, 55.17, 14.72.                                                            | [M+H] <sup>+</sup> calc. for C <sub>17</sub> H <sub>18</sub> N <sub>2</sub> O <sub>3</sub> S <sup>+</sup> , 344.10634; Found: 344.10641  |

Figure S1

**A**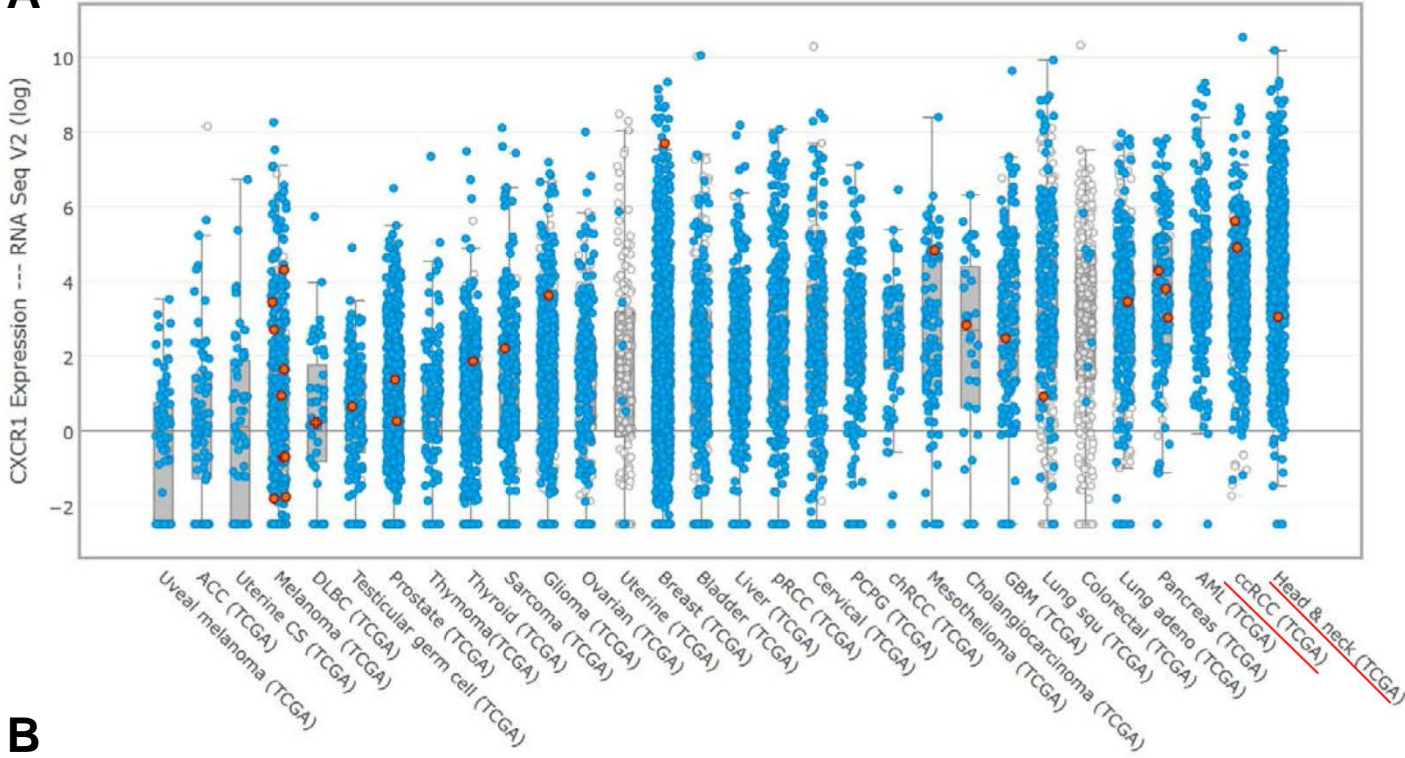**B**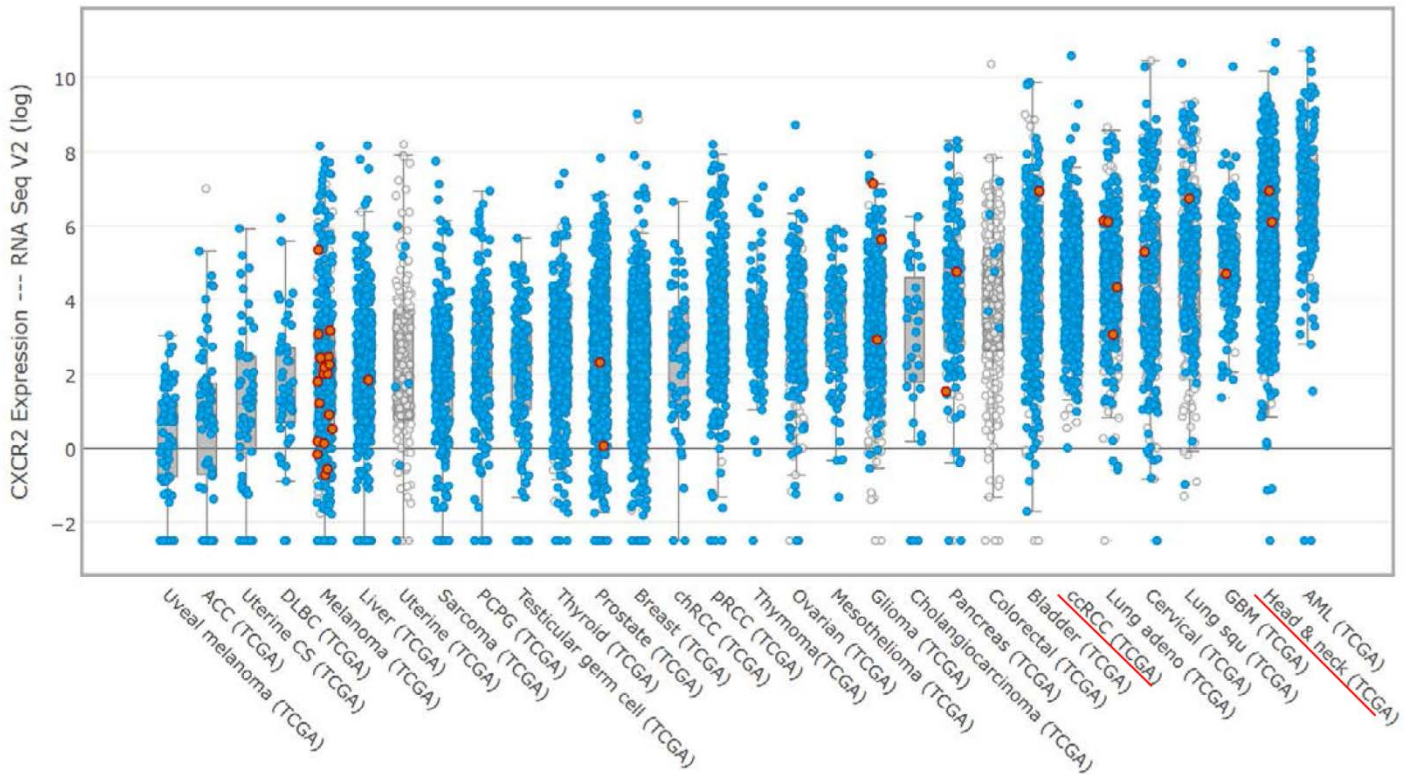**Figure S2: Dufies et al**

## RCC

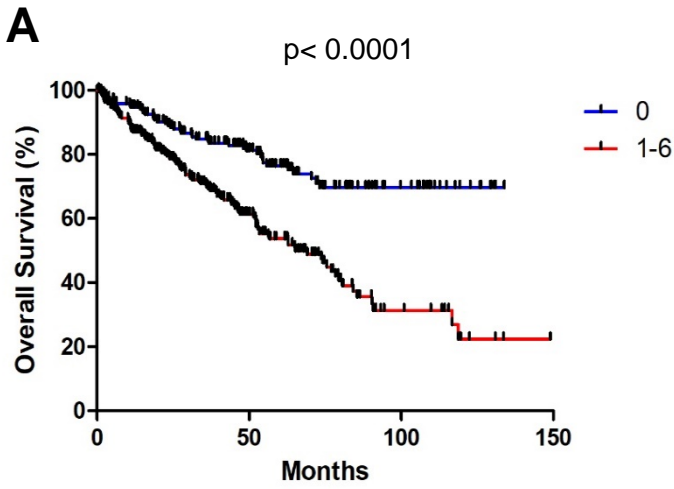

| CXCL score  | 0   | 1-6 |
|-------------|-----|-----|
| Patients nb | 201 | 245 |
| OS (Months) | NR  | 65  |

## HNSCC

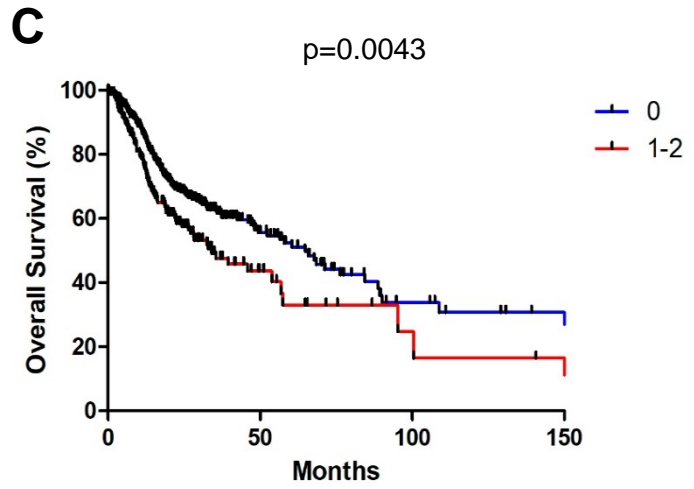

| CXCL score  | 0   | 1-2 |
|-------------|-----|-----|
| Patients nb | 324 | 170 |
| OS (Months) | 65  | 34  |

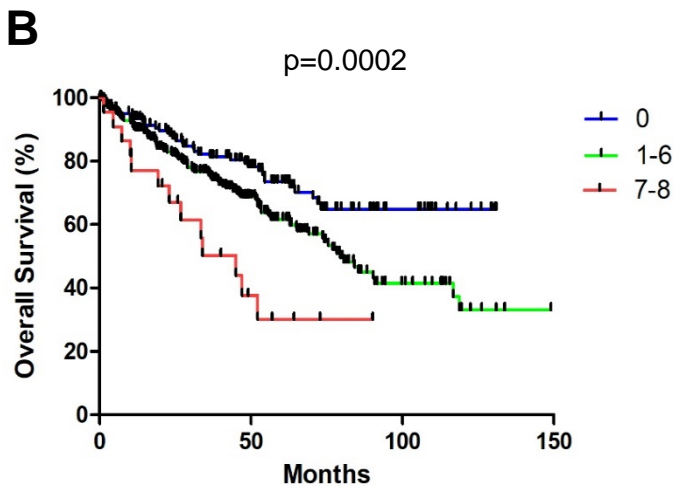

| CXCL-CXCR score | 0   | 1-6 | 7-8 |
|-----------------|-----|-----|-----|
| Patients nb     | 150 | 274 | 22  |
| OS (Months)     | NR  | 80  | 45  |

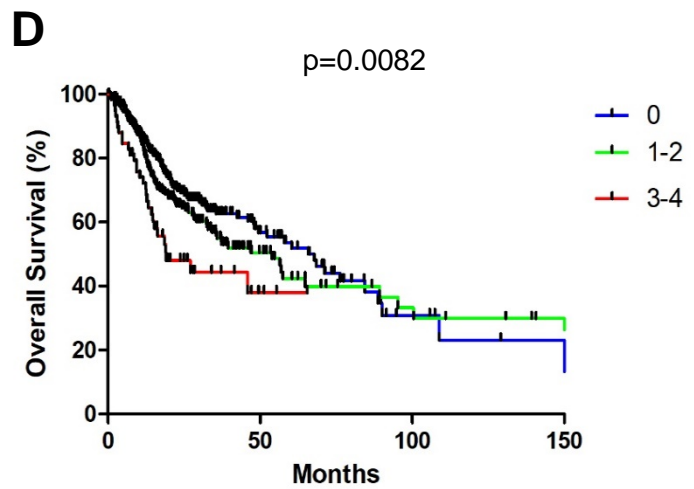

| CXCL-CXCR score | 0   | 1-2 | 3-4 |
|-----------------|-----|-----|-----|
| Patients nb     | 221 | 214 | 59  |
| OS (Months)     | 68  | 54  | 19  |

Figure S3, Dufies *et al*

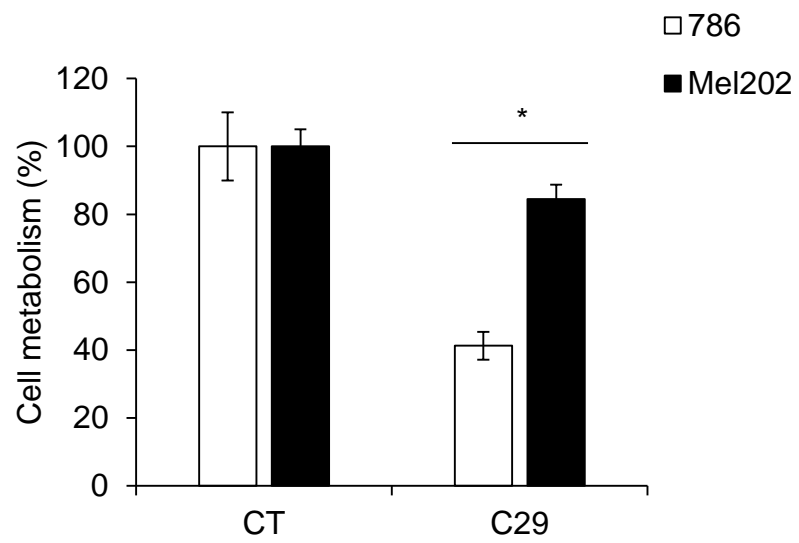

**Figure S4: Dufies *et al***

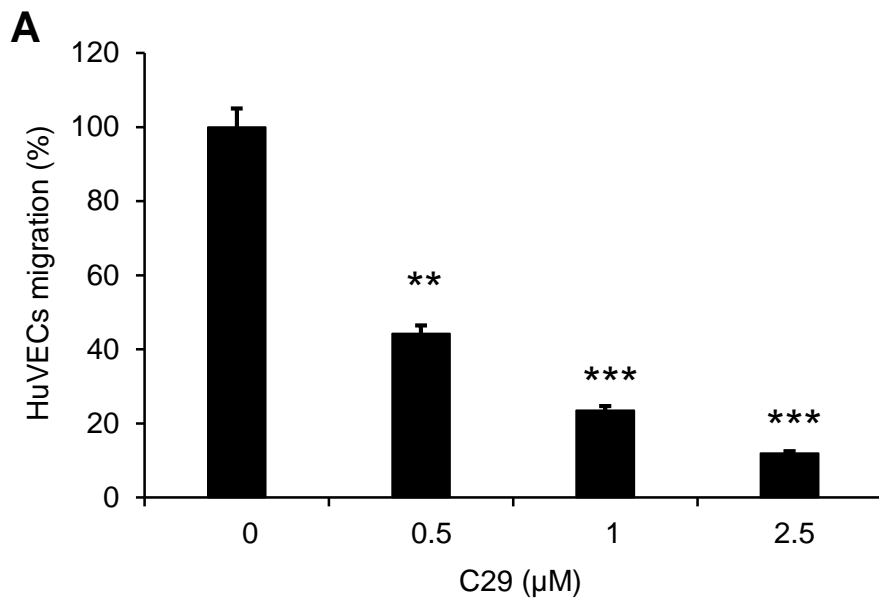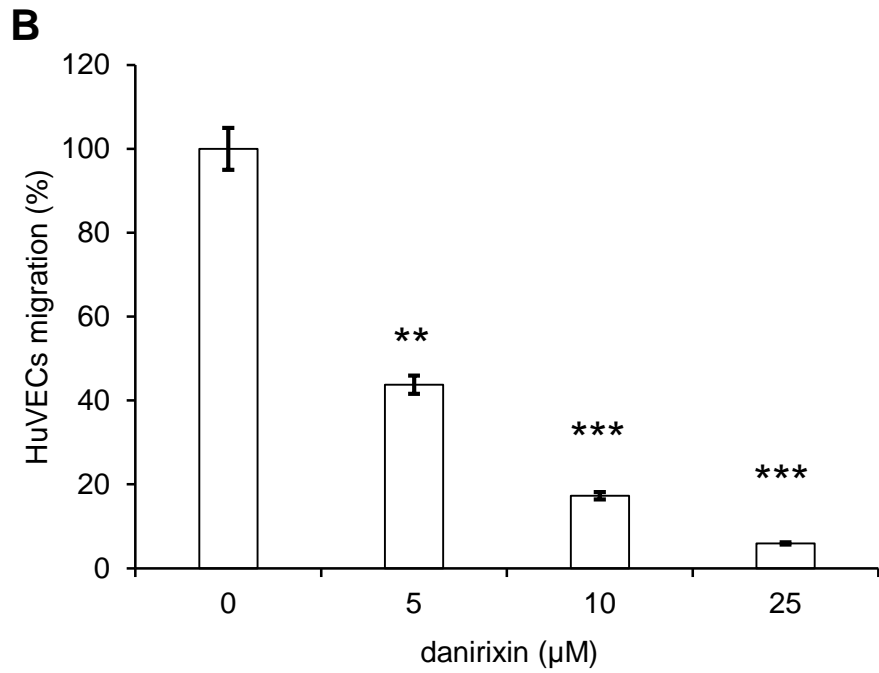

**Figure S5: Dufies *et al***

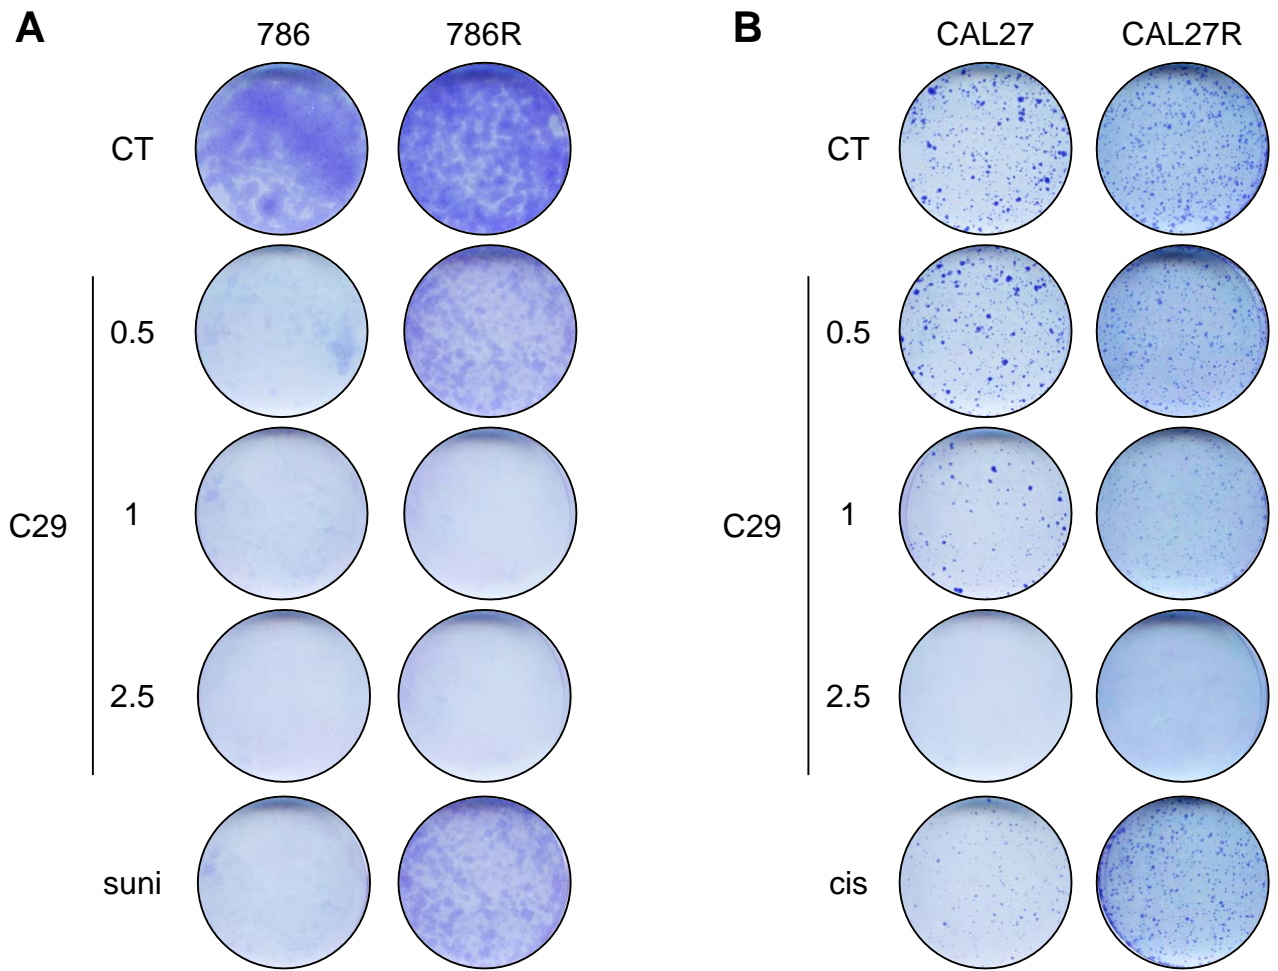

**Figure S6: Dufies *et al***

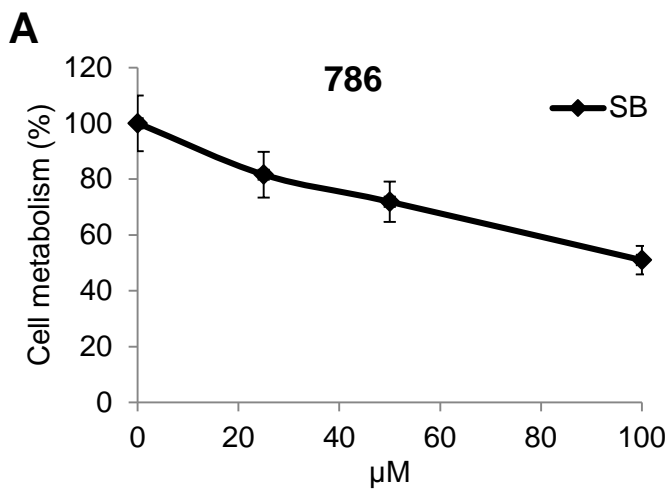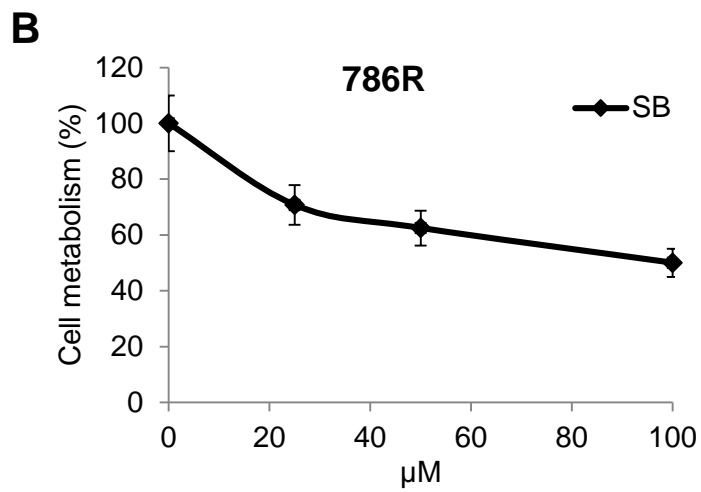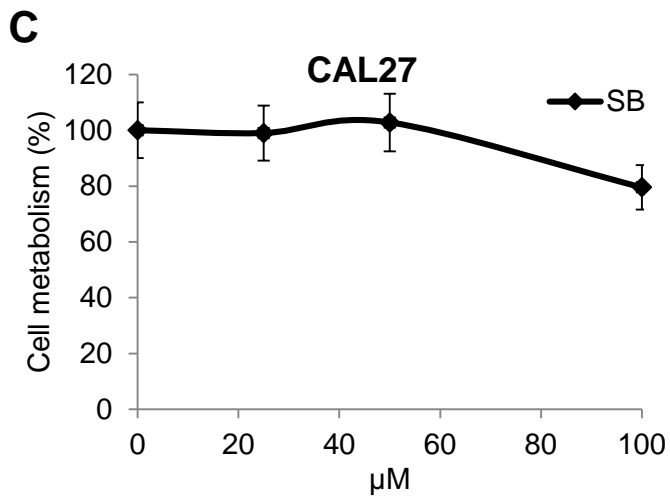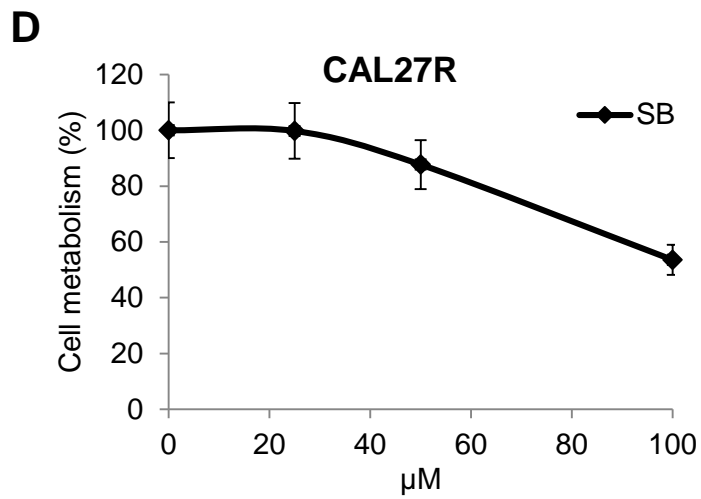

**Figure S7: Dufies *et al***



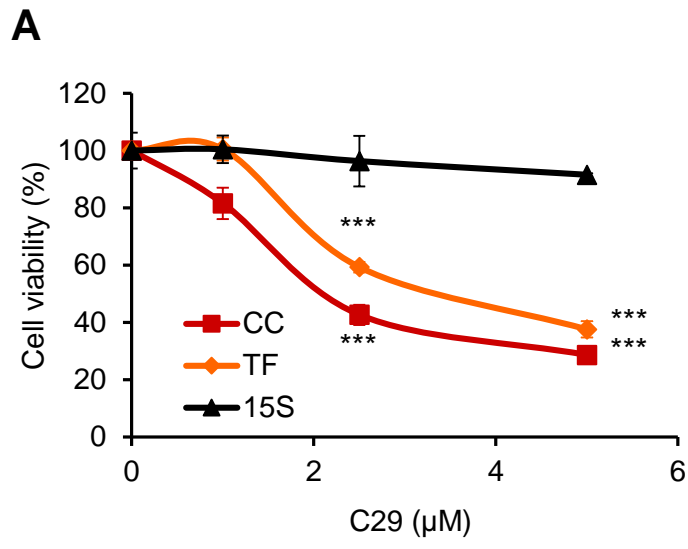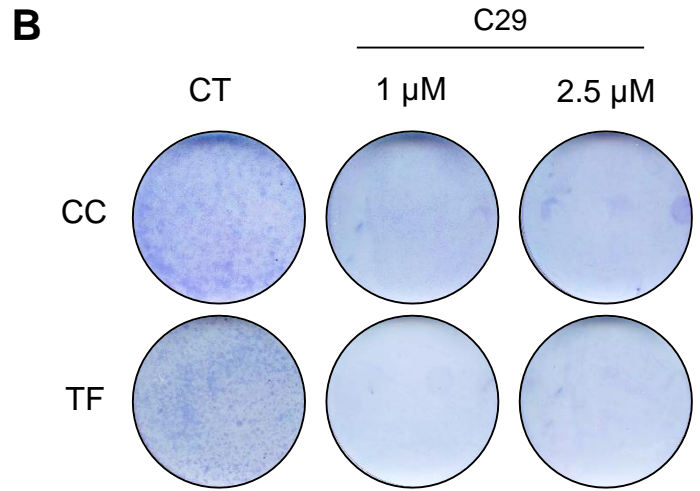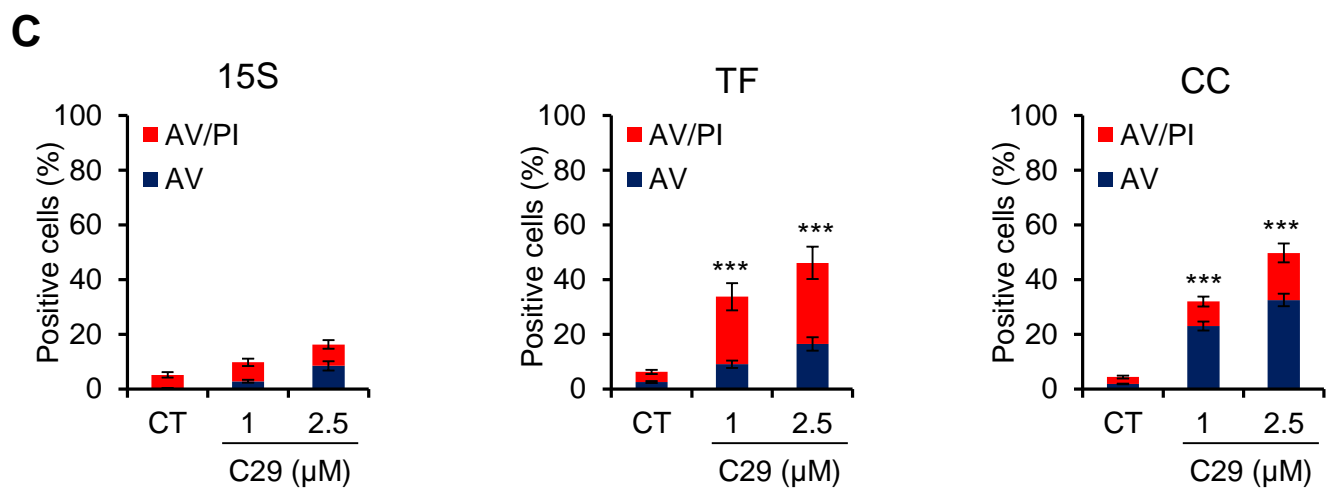

**Figure S8: Dufies *et al***

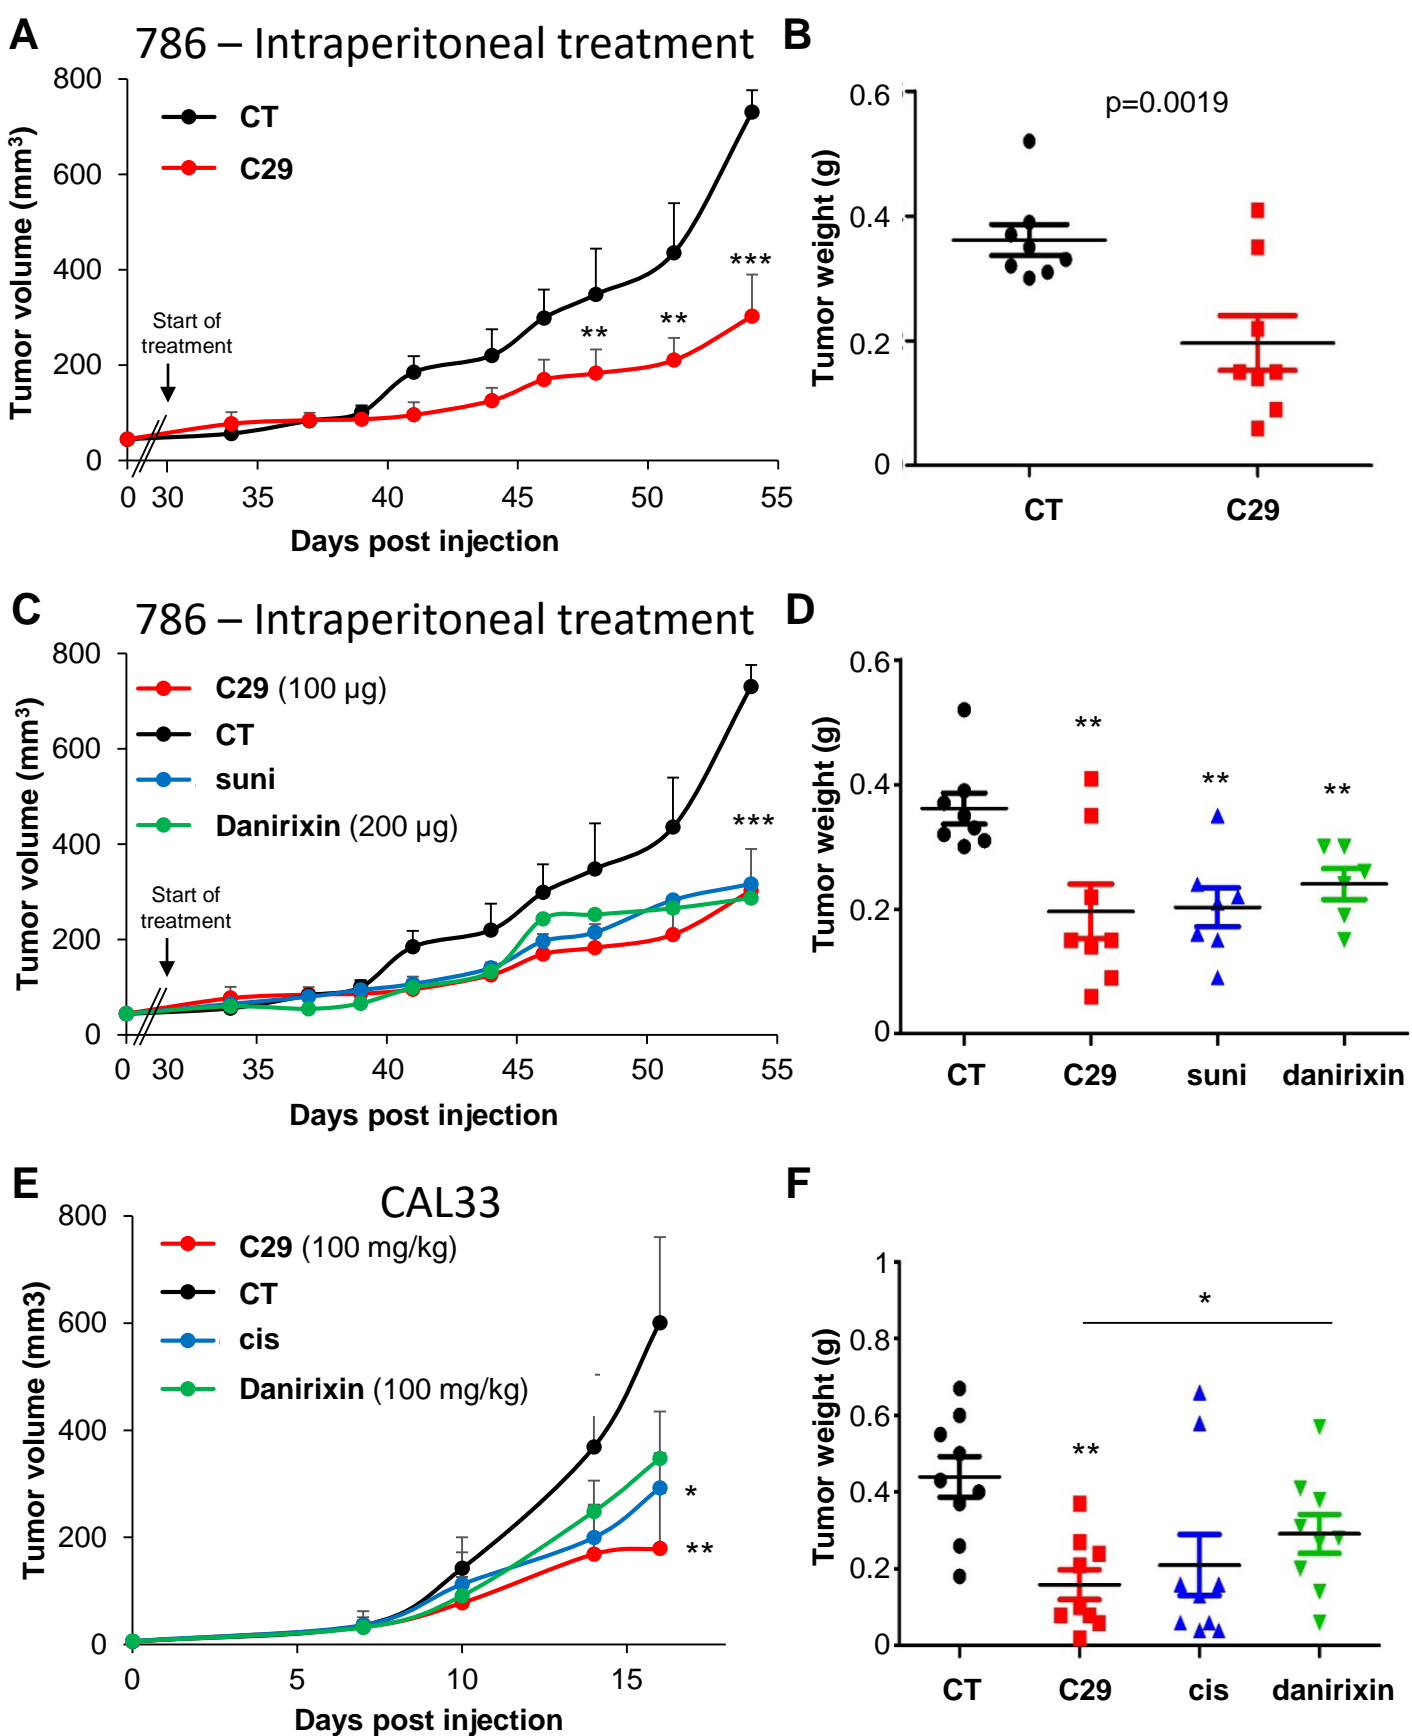

Figure S9: Dufies *et al*

**A**

|                                                  | CT                 | C29                | P Value |
|--------------------------------------------------|--------------------|--------------------|---------|
| Leucocytes (k/ $\mu$ l)                          | 3.774 $\pm$ 0.49   | 4.239 $\pm$ 0.60   | ns      |
| Neutrophils (k/ $\mu$ l)                         | 0.7836 $\pm$ 0.12  | 0.6760 $\pm$ 0.11  | ns      |
| Lymphocytes (k/ $\mu$ l)                         | 2.528 $\pm$ 0.29   | 2.943 $\pm$ 0.38   | ns      |
| Monocytes (k/ $\mu$ l)                           | 0.2671 $\pm$ 0.04  | 0.2664 $\pm$ 0.04  | ns      |
| Eosinophils (k/ $\mu$ l)                         | 0.1478 $\pm$ 0.03  | 0.1760 $\pm$ 0.04  | ns      |
| Basophils (k/ $\mu$ l)                           | 0.05289 $\pm$ 0.01 | 0.07089 $\pm$ 0.02 | ns      |
| Red blood cells (M/ $\mu$ l)                     | 8.514 $\pm$ 1.33   | 10.33 $\pm$ 0.98   | ns      |
| Hemoglobin (g/dl)                                | 11.61 $\pm$ 1.04   | 14.67 $\pm$ 1.22   | ns      |
| Hematocrit (%)                                   | 21.56 $\pm$ 1.94   | 26.22 $\pm$ 2.45   | ns      |
| Mean Corpuscular Volume (fl)                     | 111.4 $\pm$ 1.47   | 112.0 $\pm$ 1.054  | ns      |
| Mean corpuscular hemoglobin (pg)                 | 31.42 $\pm$ 0.78   | 31.46 $\pm$ 0.79   | ns      |
| Mean corpuscular hemoglobin concentration (g/dl) | 62.13 $\pm$ 1.98   | 61.87 $\pm$ 1.49   | ns      |
| Platelets (k/ $\mu$ l)                           | 348.5 $\pm$ 83.56  | 375.7 $\pm$ 77.93  | ns      |
| Mean platelet volume (fl)                        | 13.02 $\pm$ 0.34   | 12.81 $\pm$ 0.08   | ns      |

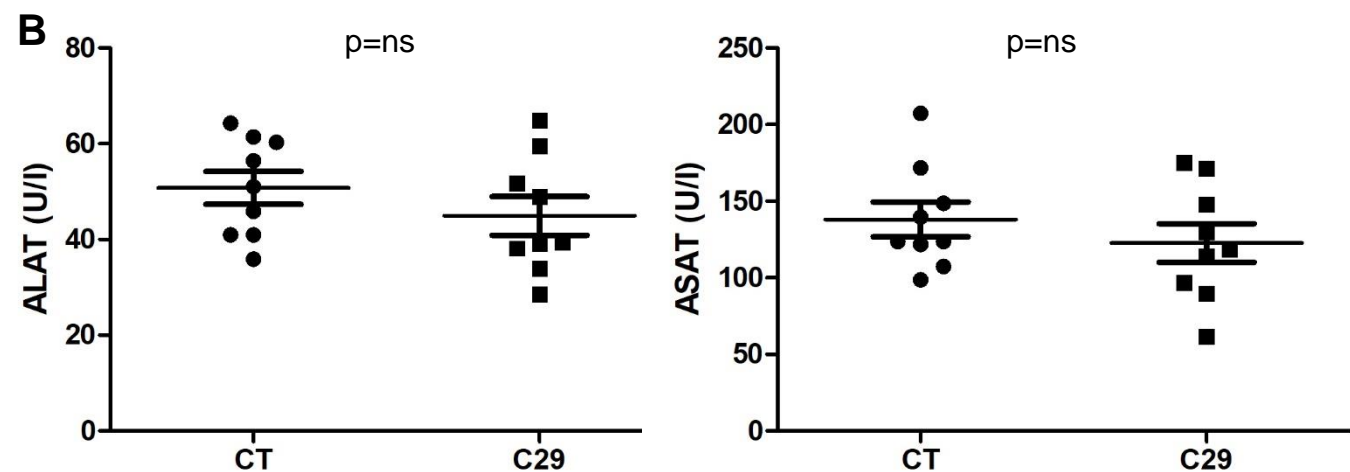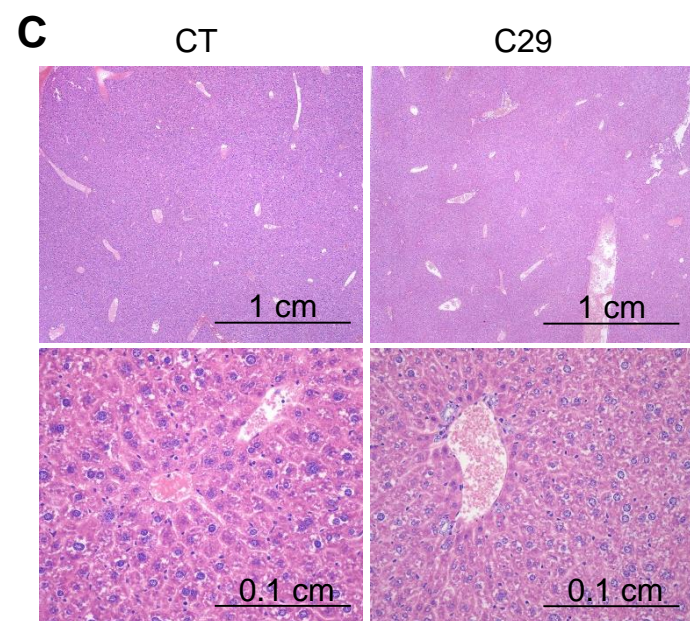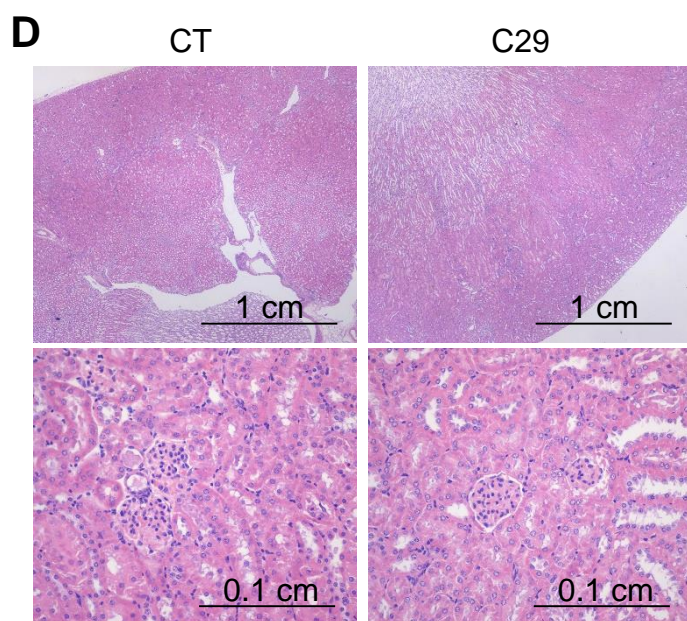

Figure S10: Dufies *et al*
